# Supplementary material for: Comparison of carbon content between plantation and natural regeneration seedlings in Durango, Mexico
Source: PeerJ. 2023 Feb 9;11:e14774. doi: 10.7717/peerj.14774 (PMC9922496; doi:10.7717/peerj.14774)
Supplement: Supplemental Information 1 [file peerj-11-14774-s001.xlsx]

## Sheet: Sheet 1
Study area	Site	Tree	Species	year	Length(µm)	Length(mm)	Length(cm)	DBSC	DBCC	Biomass/DB	Biomass/year	Carbon/DB	Carbon/year		Where:
Plantation	1	1	P. durangensis	1	2161	2.161	0.2161	0.2161	0.3561	0.00143186	0.00143186	0.000721083	0.000721083		DBSC = Basal Diameter without bark
Plantation	1	1	P. durangensis	2	4062	4.062	0.4062	0.6223	0.7623	0.00996358	0.00853173	0.00501766	0.00429658		DBCC = Basal Diameter with bark
Plantation	1	1	P. durangensis	3	9107.5	9.1075	0.91075	1.53305	1.67305	0.073881	0.0639174	0.0372065	0.0321888
Plantation	1	1	P. durangensis	4	12100.5	12.1005	1.21005	2.7431	2.8831	0.295763	0.221882	0.148946	0.11174
Plantation	1	1	P. durangensis	5	14447	14.447	1.4447	4.1878	4.3278	0.832858	0.537095	0.419427	0.270481
Plantation	1	1	P. durangensis	6	17618	17.618	1.7618	5.9496	6.0896	1.9889	1.15604	1.00161	0.582183
Plantation	1	1	P. durangensis	7	11519.5	11.5195	1.15195	7.10155	7.24155	3.09308	1.10418	1.55768	0.556067
Plantation	2	2	P. durangensis	1	8600	8.6	0.86	0.86	0.97	0.0184135	0.0184135	0.00927305	0.00927305
Plantation	2	2	P. durangensis	2	14482.5	14.4825	1.44825	2.30825	2.41825	0.188939	0.170525	0.0951495	0.0858765
Plantation	2	2	P. durangensis	3	10592	10.592	1.0592	3.36745	3.47745	0.476891	0.287952	0.240162	0.145013
Plantation	2	2	P. durangensis	4	13219.5	13.2195	1.32195	4.6894	4.7994	1.08408	0.607192	0.545944	0.305782
Plantation	2	2	P. durangensis	5	8990	8.99	0.899	5.5884	5.6984	1.67925	0.59517	0.845672	0.299728
Plantation	2	2	P. durangensis	6	11077.5	11.0775	1.10775	6.69615	6.80615	2.6409	0.96165	1.32996	0.484287
Plantation	2	2	P. durangensis	7	20471	20.471	2.0471	8.74325	8.85325	5.16212	2.52122	2.59965	1.26969
Plantation	3	3	P. durangensis	1	3888	3.888	0.3888	0.3888	0.4988	0.00338009	0.00338009	0.00170221	0.00170221
Plantation	3	3	P. durangensis	2	6294.5	6.2945	0.62945	1.01825	1.12825	0.027066	0.0236859	0.0136304	0.0119282
Plantation	3	3	P. durangensis	3	10472.5	10.4725	1.04725	2.0655	2.1755	0.144286	0.11722	0.0726623	0.0590319
Plantation	3	3	P. durangensis	4	13650	13.65	1.365	3.4305	3.5405	0.499239	0.354954	0.251417	0.178755
Plantation	3	3	P. durangensis	5	16510.5	16.5105	1.65105	5.08155	5.19155	1.32435	0.825109	0.666942	0.415525
Plantation	3	3	P. durangensis	6	10746.5	10.7465	1.07465	6.1562	6.2662	2.13923	0.814882	1.07732	0.410375
Plantation	3	3	P. durangensis	7	7420	7.42	0.742	6.8982	7.0082	2.84534	0.706115	1.43292	0.355599
Plantation	4	4	P. durangensis	1	4868.5	4.8685	0.48685	0.48685	0.59685	0.00534046	0.00534046	0.00268945	0.00268945
Plantation	4	4	P. durangensis	2	5658	5.658	0.5658	1.05265	1.16265	0.0292193	0.0238788	0.0147148	0.0120254
Plantation	4	4	P. durangensis	3	11392	11.392	1.1392	2.19185	2.30185	0.166615	0.137396	0.0839075	0.0691927
Plantation	4	4	P. durangensis	4	12773	12.773	1.2773	3.46915	3.57915	0.513248	0.346633	0.258472	0.174564
Plantation	4	4	P. durangensis	5	19536	19.536	1.9536	5.42275	5.53275	1.55762	1.04437	0.784417	0.525945
Plantation	4	4	P. durangensis	6	14166	14.166	1.4166	6.83935	6.94935	2.78484	1.22722	1.40245	0.618029
Plantation	4	4	P. durangensis	7	9033	9.033	0.9033	7.74265	7.85265	3.80251	1.01767	1.91494	0.512499
Plantation	5	5	P. durangensis	1	4683	4.683	0.4683	0.4683	0.6083	0.00560548	0.00560548	0.00282292	0.00282292
Plantation	5	5	P. durangensis	2	6503.5	6.5035	0.65035	1.11865	1.25865	0.0357677	0.0301622	0.0180126	0.0151897
Plantation	5	5	P. durangensis	3	12898	12.898	1.2898	2.40845	2.54845	0.215958	0.18019	0.108757	0.0907439
Plantation	5	5	P. durangensis	4	16473	16.473	1.6473	4.05575	4.19575	0.769609	0.553651	0.387575	0.278819
Plantation	5	5	P. durangensis	5	18670.5	18.6705	1.86705	5.9228	6.0628	1.96667	1.19706	0.990413	0.602838
Plantation	5	5	P. durangensis	6	18381	18.381	1.8381	7.7609	7.9009	3.86235	1.89568	1.94508	0.954664
Plantation	5	5	P. durangensis	7	18777	18.777	1.8777	9.6386	9.7786	6.65074	2.7884	3.34932	1.40424
Plantation	6	6	P. durangensis	1	2291	2.291	0.2291	0.2291	0.3491	0.00136121	0.00136121	0.000685503	0.000685503
Plantation	6	6	P. durangensis	2	2717	2.717	0.2717	0.5008	0.6208	0.00590376	0.00454255	0.00297313	0.00228763
Plantation	6	6	P. durangensis	3	3865.5	3.8655	0.38655	0.88735	1.00735	0.0202749	0.0143712	0.0102105	0.00723732
Plantation	6	6	P. durangensis	4	13237	13.237	1.3237	2.21105	2.33105	0.172056	0.151781	0.0866472	0.0764367
Plantation	6	6	P. durangensis	5	16890.5	16.8905	1.68905	3.9001	4.0201	0.690132	0.518076	0.34755	0.260903
Plantation	6	6	P. durangensis	6	17640.5	17.6405	1.76405	5.66415	5.78415	1.74441	1.05428	0.878486	0.530936
Plantation	6	6	P. durangensis	7	18295.5	18.2955	1.82955	7.4937	7.6137	3.51451	1.77009	1.76991	0.891419
Plantation	7	7	P. durangensis	1	7767.5	7.7675	0.77675	0.77675	0.90675	0.0155059	0.0155059	0.00780878	0.00780878
Plantation	7	7	P. durangensis	2	6003	6.003	0.6003	1.37705	1.50705	0.0566063	0.0411004	0.0285069	0.0206982
Plantation	7	7	P. durangensis	3	8118.5	8.1185	0.81185	2.1889	2.3189	0.169779	0.113173	0.0855007	0.0569937
Plantation	7	7	P. durangensis	4	12813	12.813	1.2813	3.4702	3.6002	0.520977	0.351198	0.262364	0.176863
Plantation	7	7	P. durangensis	5	12684.5	12.6845	1.26845	4.73865	4.86865	1.1244	0.603421	0.566247	0.303883
Plantation	7	7	P. durangensis	6	14609	14.609	1.4609	6.19955	6.32955	2.19479	1.07039	1.10529	0.539047
Plantation	7	7	P. durangensis	7	10350.5	10.3505	1.03505	7.2346	7.3646	3.22881	1.03403	1.62603	0.520736
Plantation	8	8	P. durangensis	1	4368	4.368	0.4368	0.4368	0.5768	0.00489502	0.00489502	0.00246513	0.00246513
Plantation	8	8	P. durangensis	2	6302	6.302	0.6302	1.067	1.207	0.0321446	0.0272496	0.016188	0.0137229
Plantation	8	8	P. durangensis	3	11516	11.516	1.1516	2.2186	2.3586	0.177286	0.145141	0.0892812	0.0730932
Plantation	8	8	P. durangensis	4	18600	18.6	1.86	4.0786	4.2186	0.780337	0.603051	0.392978	0.303696
Plantation	8	8	P. durangensis	5	21488.5	21.4885	2.14885	6.22745	6.36745	2.22844	1.4481	1.12224	0.729263
Plantation	8	8	P. durangensis	6	13961	13.961	1.3961	7.62355	7.76355	3.69351	1.46507	1.86005	0.737809
Plantation	8	8	P. durangensis	7	11062.5	11.0625	1.10625	8.7298	8.8698	5.18676	1.49325	2.61205	0.752
Plantation	9	9	P. durangensis	1	4064	4.064	0.4064	0.4064	0.5464	0.00426403	0.00426403	0.00214737	0.00214737
Plantation	9	9	P. durangensis	2	8685	8.685	0.8685	1.2749	1.4149	0.0481973	0.0439333	0.0242722	0.0221248
Plantation	9	9	P. durangensis	3	12790.5	12.7905	1.27905	2.55395	2.69395	0.248788	0.200591	0.12529	0.101018
Plantation	9	9	P. durangensis	4	14403	14.403	1.4403	3.99425	4.13425	0.741182	0.492394	0.373259	0.24797
Plantation	9	9	P. durangensis	5	19444	19.444	1.9444	5.93865	6.07865	1.9798	1.23861	0.997026	0.623766
Plantation	9	9	P. durangensis	6	14580	14.58	1.458	7.39665	7.53665	3.42456	1.44477	1.72461	0.727584
Plantation	9	9	P. durangensis	7	11252.5	11.2525	1.12525	8.5219	8.6619	4.88249	1.45793	2.45882	0.734213
Plantation	10	10	P. durangensis	1	4189	4.189	0.4189	0.4189	0.6189	0.00585781	0.00585781	0.00294999	0.00294999
Plantation	10	10	P. durangensis	2	7456	7.456	0.7456	1.1645	1.3645	0.0439414	0.0380836	0.0221289	0.0191789
Plantation	10	10	P. durangensis	3	14020.5	14.0205	1.40205	2.56655	2.76655	0.266236	0.222294	0.134076	0.111947
Plantation	10	10	P. durangensis	4	15591	15.591	1.5591	4.12565	4.32565	0.831804	0.565568	0.418896	0.28482
Plantation	10	10	P. durangensis	5	15419	15.419	1.5419	5.66755	5.86755	1.80924	0.977435	0.911132	0.492236
Plantation	10	10	P. durangensis	6	15101.5	15.1015	1.51015	7.1777	7.3777	3.24347	1.43423	1.63341	0.72228
Plantation	10	10	P. durangensis	7	8759	8.759	0.8759	8.0536	8.2536	4.31712	1.07365	2.1741	0.540688
Plantation	11	11	P. durangensis	1	5950	5.95	0.595	0.595	0.735	0.00907917	0.00907917	0.00457227	0.00457227
Plantation	11	11	P. durangensis	2	14021	14.021	1.4021	1.9971	2.1371	0.137883	0.128804	0.0694379	0.0648656
Plantation	11	11	P. durangensis	3	13991	13.991	1.3991	3.3962	3.5362	0.497696	0.359813	0.250639	0.181202
Plantation	11	11	P. durangensis	4	14929.5	14.9295	1.49295	4.88915	5.02915	1.2213	0.723605	0.615047	0.364407
Plantation	11	11	P. durangensis	5	17155	17.155	1.7155	6.60465	6.74465	2.58051	1.35921	1.29954	0.684496
Plantation	11	11	P. durangensis	6	15129	15.129	1.5129	8.11755	8.25755	4.32238	1.74188	2.17675	0.87721
Plantation	11	11	P. durangensis	7	15388.5	15.3885	1.53885	9.6564	9.7964	6.68164	2.35926	3.36488	1.18812
Plantation	12	12	P. durangensis	1	5816	5.816	0.5816	0.5816	0.7316	0.00897251	0.00897251	0.00451856	0.00451856
Plantation	12	12	P. durangensis	2	11288.5	11.2885	1.12885	1.71045	1.86045	0.0968401	0.0878676	0.0487687	0.0442501
Plantation	12	12	P. durangensis	3	11586	11.586	1.1586	2.86905	3.01905	0.332619	0.235778	0.167507	0.118738
Plantation	12	12	P. durangensis	4	9630	9.63	0.963	3.83205	3.98205	0.673605	0.340986	0.339227	0.171721
Plantation	12	12	P. durangensis	5	17339.5	17.3395	1.73395	5.566	5.716	1.6925	1.0189	0.852345	0.513118
Plantation	12	12	P. durangensis	6	14606.5	14.6065	1.46065	7.02665	7.17665	3.02292	1.33041	1.52234	0.669997
Plantation	12	12	P. durangensis	7	10452	10.452	1.0452	8.07185	8.22185	4.27491	1.252	2.15285	0.630505
Plantation	13	13	P. durangensis	1	6656.5	6.6565	0.66565	0.66565	0.77565	0.0104144	0.0104144	0.00524468	0.00524468
Plantation	13	13	P. durangensis	2	6899	6.899	0.6899	1.35555	1.46555	0.0527176	0.0423032	0.0265486	0.0213039
Plantation	13	13	P. durangensis	3	6151	6.151	0.6151	1.97065	2.08065	0.128789	0.0760714	0.0648581	0.0383096
Plantation	13	13	P. durangensis	4	5761.5	5.7615	0.57615	2.5468	2.6568	0.240137	0.111348	0.120933	0.0560748
Plantation	13	13	P. durangensis	5	10714.5	10.7145	1.07145	3.61825	3.72825	0.569515	0.329378	0.286808	0.165875
Plantation	13	13	P. durangensis	6	15794	15.794	1.5794	5.19765	5.30765	1.40115	0.831633	0.705618	0.41881
Plantation	13	13	P. durangensis	7	15673.5	15.6735	1.56735	6.765	6.875	2.70953	1.30838	1.36452	0.6589
Plantation	14	14	P. durangensis	1	2345.5	2.3455	0.23455	0.23455	0.33455	0.00122124	0.00122124	0.000615014	0.000615014
Plantation	14	14	P. durangensis	2	8742.5	8.7425	0.87425	1.1088	1.2088	0.032267	0.0310457	0.0162496	0.0156346
Plantation	14	14	P. durangensis	3	10305.5	10.3055	1.03055	2.13935	2.23935	0.155326	0.123059	0.0782221	0.0619725
Plantation	14	14	P. durangensis	4	8346.5	8.3465	0.83465	2.974	3.074	0.348267	0.192941	0.175387	0.0971653
Plantation	14	14	P. durangensis	5	10436	10.436	1.0436	4.0176	4.1176	0.733598	0.385331	0.36944	0.194053
Plantation	14	14	P. durangensis	6	11806.5	11.8065	1.18065	5.19825	5.29825	1.39483	0.661234	0.702437	0.332997
Plantation	14	14	P. durangensis	7	10867.5	10.8675	1.08675	6.285	6.385	2.24413	0.849294	1.13014	0.427704
Plantation	15	15	P. durangensis	1	3277.5	3.2775	0.32775	0.32775	0.49775	0.00336198	0.00336198	0.00169309	0.00169309
Plantation	15	15	P. durangensis	2	5841.5	5.8415	0.58415	0.9119	1.0819	0.0243214	0.0209595	0.0122483	0.0105552
Plantation	15	15	P. durangensis	3	13293.5	13.2935	1.32935	2.24125	2.41125	0.187548	0.163226	0.0944491	0.0822008
Plantation	15	15	P. durangensis	4	16795.5	16.7955	1.67955	3.9208	4.0908	0.721489	0.533942	0.363342	0.268893
Plantation	15	15	P. durangensis	5	22301.5	22.3015	2.23015	6.15095	6.32095	2.18719	1.4657	1.10147	0.738128
Plantation	15	15	P. durangensis	6	16143.5	16.1435	1.61435	7.7653	7.9353	3.90535	1.71816	1.96674	0.865265
Plantation	15	15	P. durangensis	7	12513.5	12.5135	1.25135	9.01665	9.18665	5.67215	1.7668	2.8565	0.889762
Plantation	16	16	P. durangensis	1	1801	1.801	0.1801	0.1801	0.3001	0.000925782	0.000925782	0.000466224	0.000466224
Plantation	16	16	P. durangensis	2	8795.5	8.7955	0.87955	1.05965	1.17965	0.0303206	0.0293948	0.0152694	0.0148032
Plantation	16	16	P. durangensis	3	13383.5	13.3835	1.33835	2.398	2.518	0.209442	0.179121	0.105475	0.0902056
Plantation	16	16	P. durangensis	4	10880.5	10.8805	1.08805	3.48605	3.60605	0.523137	0.313695	0.263452	0.157977
Plantation	16	16	P. durangensis	5	24022.5	24.0225	2.40225	5.8883	6.0083	1.92192	1.39878	0.967879	0.704427
Plantation	16	16	P. durangensis	6	22306.5	22.3065	2.23065	8.11895	8.23895	4.29761	2.37569	2.16428	1.1964
Plantation	16	16	P. durangensis	7	11192	11.192	1.1192	9.23815	9.35815	5.94596	1.64835	2.99439	0.830109
Natural regeneration	1	17	P. durangensis	1	7109	7.109	0.7109	0.7109	0.8909	0.0148244	0.0148244	0.00746557	0.00746557
Natural regeneration	1	17	P. durangensis	2	7615	7.615	0.7615	1.4724	1.6524	0.0715789	0.0567545	0.0360471	0.0285816
Natural regeneration	1	17	P. durangensis	3	5380.5	5.3805	0.53805	2.01045	2.19045	0.146827	0.0752476	0.0739418	0.0378947
Natural regeneration	1	17	P. durangensis	4	11227.5	11.2275	1.12275	3.1332	3.3132	0.421561	0.274734	0.212298	0.138356
Natural regeneration	1	17	P. durangensis	5	15872.5	15.8725	1.58725	4.72045	4.90045	1.14321	0.72165	0.575721	0.363423
Natural regeneration	1	17	P. durangensis	6	11065	11.065	1.1065	5.82695	6.00695	1.92082	0.777608	0.967324	0.391603
Natural regeneration	1	17	P. durangensis	7	10704	10.704	1.0704	6.89735	7.07735	2.91745	0.996631	1.46923	0.501903
Natural regeneration	1	17	P. durangensis	8	10322	10.322	1.0322	7.92955	8.10955	4.12766	1.21021	2.07869	0.609462
Natural regeneration	1	17	P. durangensis	9	13718.5	13.7185	1.37185	9.3014	9.4814	6.1476	2.01994	3.09593	1.01724
Natural regeneration	1	17	P. durangensis	10	12586.5	12.5865	1.25865	10.5601	10.7401	8.4466	2.299	4.25371	1.15778
Natural regeneration	1	17	P. durangensis	11	8774.5	8.7745	0.87745	11.4375	11.6175	10.3184	1.8718	5.19635	0.942637
Natural regeneration	1	17	P. durangensis	12	7372.5	7.3725	0.73725	12.1748	12.3548	12.0703	1.75194	6.07862	0.882278
Natural regeneration	2	18	P. durangensis	1	3968	3.968	0.3968	0.3968	0.6168	0.00580728	0.00580728	0.00292455	0.00292455
Natural regeneration	2	18	P. durangensis	2	2319	2.319	0.2319	0.6287	0.8487	0.0130997	0.00729243	0.00659702	0.00367247
Natural regeneration	2	18	P. durangensis	3	3660	3.66	0.366	0.9947	1.2147	0.0326699	0.0195702	0.0164526	0.00985554
Natural regeneration	2	18	P. durangensis	4	6544	6.544	0.6544	1.6491	1.8691	0.0979919	0.065322	0.0493487	0.0328962
Natural regeneration	2	18	P. durangensis	5	4919.5	4.9195	0.49195	2.14105	2.36105	0.177756	0.0797638	0.0895178	0.0401691
Natural regeneration	2	18	P. durangensis	6	6492.5	6.4925	0.64925	2.7903	3.0103	0.330167	0.152411	0.166272	0.0767543
Natural regeneration	2	18	P. durangensis	7	6140.5	6.1405	0.61405	3.40435	3.62435	0.52993	0.199763	0.266873	0.100601
Natural regeneration	2	18	P. durangensis	8	7825	7.825	0.7825	4.18685	4.40685	0.872182	0.342252	0.439231	0.172358
Natural regeneration	2	18	P. durangensis	9	9311	9.311	0.9311	5.11795	5.33795	1.42163	0.549443	0.715931	0.2767
Natural regeneration	2	18	P. durangensis	10	10491	10.491	1.0491	6.16705	6.38705	2.24596	0.824337	1.13107	0.415136
Natural regeneration	2	18	P. durangensis	11	7127.5	7.1275	0.71275	6.8798	7.0998	2.9411	0.695133	1.48114	0.350069
Natural regeneration	3	19	P. durangensis	1	6065	6.065	0.6065	0.6065	0.7765	0.0104435	0.0104435	0.00525934	0.00525934
Natural regeneration	3	19	P. durangensis	2	5178	5.178	0.5178	1.1243	1.2943	0.0384068	0.0279633	0.0193416	0.0140823
Natural regeneration	3	19	P. durangensis	3	5249	5.249	0.5249	1.6492	1.8192	0.0914611	0.0530543	0.0460598	0.0267182
Natural regeneration	3	19	P. durangensis	4	7170.5	7.1705	0.71705	2.36625	2.53625	0.213333	0.121872	0.107434	0.0613746
Natural regeneration	3	19	P. durangensis	5	7887	7.887	0.7887	3.15495	3.32495	0.425382	0.212049	0.214222	0.106788
Natural regeneration	3	19	P. durangensis	6	8680	8.68	0.868	4.02295	4.19295	0.768301	0.342919	0.386916	0.172694
Natural regeneration	3	19	P. durangensis	7	8354	8.354	0.8354	4.85835	5.02835	1.22081	0.452505	0.614798	0.227881
Natural regeneration	3	19	P. durangensis	8	7216	7.216	0.7216	5.57995	5.74995	1.71824	0.497439	0.865308	0.25051
Natural regeneration	3	19	P. durangensis	9	7563	7.563	0.7563	6.33625	6.50625	2.35435	0.636103	1.18565	0.320341
Natural regeneration	4	20	P. durangensis	1	6684	6.684	0.6684	0.6684	0.8484	0.0130879	0.0130879	0.00659107	0.00659107
Natural regeneration	4	20	P. durangensis	2	3543.5	3.5435	0.35435	1.02275	1.20275	0.0318569	0.018769	0.0160432	0.00945208
Natural regeneration	4	20	P. durangensis	3	6224.5	6.2245	0.62245	1.6452	1.8252	0.0922319	0.060375	0.046448	0.0304048
Natural regeneration	4	20	P. durangensis	4	7190	7.19	0.719	2.3642	2.5442	0.215041	0.12281	0.108295	0.0618469
Natural regeneration	4	20	P. durangensis	5	8564.5	8.5645	0.85645	3.22065	3.40065	0.450503	0.235462	0.226874	0.118579
Natural regeneration	4	20	P. durangensis	6	12400.5	12.4005	1.24005	4.4607	4.6407	0.995041	0.544538	0.501103	0.274229
Natural regeneration	4	20	P. durangensis	7	9222.5	9.2225	0.92225	5.38295	5.56295	1.57938	0.58434	0.795376	0.294273
Natural regeneration	4	20	P. durangensis	8	8326.5	8.3265	0.83265	6.2156	6.3956	2.25363	0.674253	1.13493	0.339554
Natural regeneration	5	21	P. durangensis	1	7095.5	7.0955	0.70955	0.70955	0.89955	0.015194	0.015194	0.00765171	0.00765171
Natural regeneration	5	21	P. durangensis	2	8244	8.244	0.8244	1.53395	1.72395	0.0797457	0.0645517	0.0401599	0.0325082
Natural regeneration	5	21	P. durangensis	3	9439.5	9.4395	0.94395	2.4779	2.6679	0.242702	0.162957	0.122225	0.082065
Natural regeneration	5	21	P. durangensis	4	13665.5	13.6655	1.36655	3.84445	4.03445	0.696428	0.453726	0.350721	0.228496
Natural regeneration	5	21	P. durangensis	5	13480	13.48	1.348	5.19245	5.38245	1.45203	0.7556	0.731241	0.38052
Natural regeneration	5	21	P. durangensis	6	8343	8.343	0.8343	6.02675	6.21675	2.09646	0.644437	1.05578	0.324538
Natural regeneration	5	21	P. durangensis	7	10829	10.829	1.0829	7.10965	7.29965	3.15673	1.06026	1.58973	0.533949
Natural regeneration	5	21	P. durangensis	8	20313	20.313	2.0313	9.14095	9.33095	5.90201	2.74528	2.97225	1.38252
Natural regeneration	5	21	P. durangensis	9	10942.5	10.9425	1.09425	10.2352	10.4252	7.82973	1.92771	3.94305	0.970797
Natural regeneration	5	21	P. durangensis	10	5527.5	5.5275	0.55275	10.7879	10.9779	8.93169	1.10196	4.498	0.554949
Natural regeneration	6	22	P. durangensis	1	5241	5.241	0.5241	0.5241	0.7741	0.0103614	0.0103614	0.00521801	0.00521801
Natural regeneration	6	22	P. durangensis	2	4320.5	4.3205	0.43205	0.95615	1.20615	0.032087	0.0217256	0.016159	0.010941
Natural regeneration	6	22	P. durangensis	3	7341	7.341	0.7341	1.69025	1.94025	0.107782	0.0756947	0.0542788	0.0381198
Natural regeneration	6	22	P. durangensis	4	7560	7.56	0.756	2.44625	2.69625	0.24933	0.141548	0.125563	0.0712838
Natural regeneration	6	22	P. durangensis	5	9410	9.41	0.941	3.38725	3.63725	0.534751	0.285421	0.269301	0.143738
Natural regeneration	6	22	P. durangensis	6	14223	14.223	1.4223	4.80955	5.05955	1.2402	0.705454	0.624567	0.355267
Natural regeneration	6	22	P. durangensis	7	10100.5	10.1005	1.01005	5.8196	6.0696	1.97229	0.732088	0.993247	0.36868
Natural regeneration	6	22	P. durangensis	8	8261.5	8.2615	0.82615	6.64575	6.89575	2.73042	0.758128	1.37504	0.381793
Natural regeneration	7	23	P. durangensis	1	4020.5	4.0205	0.40205	0.40205	0.57205	0.00479293	0.00479293	0.00241372	0.00241372
Natural regeneration	7	23	P. durangensis	2	4235	4.235	0.4235	0.82555	0.99555	0.0196751	0.0148821	0.00990836	0.00749465
Natural regeneration	7	23	P. durangensis	3	3581.5	3.5815	0.35815	1.1837	1.3537	0.0430603	0.0233853	0.0216852	0.0117768
Natural regeneration	7	23	P. durangensis	4	5492	5.492	0.5492	1.7329	1.9029	0.102572	0.0595116	0.0516552	0.02997
Natural regeneration	7	23	P. durangensis	5	7013	7.013	0.7013	2.4342	2.6042	0.228204	0.125632	0.114924	0.0632685
Natural regeneration	7	23	P. durangensis	6	9787.5	9.7875	0.97875	3.41295	3.58295	0.514638	0.286434	0.259172	0.144248
Natural regeneration	7	23	P. durangensis	7	11411	11.411	1.1411	4.55405	4.72405	1.04123	0.52659	0.524362	0.265191
Natural regeneration	7	23	P. durangensis	8	11001.5	11.0015	1.10015	5.6542	5.8242	1.77536	0.734136	0.894073	0.369711
Natural regeneration	7	23	P. durangensis	9	9425.5	9.4255	0.94255	6.59675	6.76675	2.60211	0.826748	1.31042	0.41635
Natural regeneration	8	24	P. durangensis	1	8162.5	8.1625	0.81625	0.81625	1.11625	0.0263383	0.0263383	0.013264	0.013264
Natural regeneration	8	24	P. durangensis	2	7053.5	7.0535	0.70535	1.5216	1.8216	0.0917689	0.0654307	0.0462148	0.0329509
Natural regeneration	8	24	P. durangensis	3	9365	9.365	0.9365	2.4581	2.7581	0.264168	0.172399	0.133035	0.0868201
Natural regeneration	8	24	P. durangensis	4	10355	10.355	1.0355	3.4936	3.7936	0.595305	0.331137	0.299796	0.166761
Natural regeneration	8	24	P. durangensis	5	10312	10.312	1.0312	4.5248	4.8248	1.09877	0.503461	0.553338	0.253543
Natural regeneration	8	24	P. durangensis	6	10529	10.529	1.0529	5.5777	5.8777	1.81723	0.71846	0.915155	0.361817
Natural regeneration	8	24	P. durangensis	7	9825.5	9.8255	0.98255	6.56025	6.86025	2.69474	0.877511	1.35707	0.441914
Natural regeneration	8	24	P. durangensis	8	7651.5	7.6515	0.76515	7.3254	7.6254	3.52829	0.833552	1.77685	0.419777
Natural regeneration	9	25	P. durangensis	1	3584	3.584	0.3584	0.3584	0.5084	0.00354838	0.00354838	0.00178696	0.00178696
Natural regeneration	9	25	P. durangensis	2	3272	3.272	0.3272	0.6856	0.8356	0.0125905	0.00904211	0.00634057	0.00455361
Natural regeneration	9	25	P. durangensis	3	4181.5	4.1815	0.41815	1.10375	1.25375	0.0354138	0.0228234	0.0178344	0.0114938
Natural regeneration	9	25	P. durangensis	4	4839.5	4.8395	0.48395	1.5877	1.7377	0.0813768	0.045963	0.0409814	0.023147
Natural regeneration	9	25	P. durangensis	5	6644.5	6.6445	0.66445	2.25215	2.40215	0.185749	0.104372	0.0935432	0.0525619
Natural regeneration	9	25	P. durangensis	6	6588	6.588	0.6588	2.91095	3.06095	0.344511	0.158762	0.173496	0.0799526
Natural regeneration	9	25	P. durangensis	7	8023.5	8.0235	0.80235	3.7133	3.8633	0.623581	0.27907	0.314035	0.140539
Natural regeneration	9	25	P. durangensis	8	8475	8.475	0.8475	4.5608	4.7108	1.0338	0.41022	0.520622	0.206587
Natural regeneration	9	25	P. durangensis	9	9045.5	9.0455	0.90455	5.46535	5.61535	1.61758	0.583776	0.814611	0.293989
Natural regeneration	9	25	P. durangensis	10	9385.5	9.3855	0.93855	6.4039	6.5539	2.39854	0.780968	1.20791	0.393296
Natural regeneration	9	25	P. durangensis	11	6779	6.779	0.6779	7.0818	7.2318	3.08248	0.683936	1.55234	0.34443
Natural regeneration	9	25	P. durangensis	12	6040.5	6.0405	0.60405	7.68585	7.83585	3.78181	0.69933	1.90452	0.352183
Natural regeneration	10	26	P. durangensis	1	2495.5	2.4955	0.24955	0.24955	0.42955	0.00230929	0.00230929	0.00116296	0.00116296
Natural regeneration	10	26	P. durangensis	2	2465.5	2.4655	0.24655	0.4961	0.6761	0.00733812	0.00502883	0.00369548	0.00253252
Natural regeneration	10	26	P. durangensis	3	4730.5	4.7305	0.47305	0.96915	1.14915	0.0283623	0.0210242	0.0142832	0.0105878
Natural regeneration	10	26	P. durangensis	4	4211	4.211	0.4211	1.39025	1.57025	0.0628548	0.0344925	0.0316537	0.0173704
Natural regeneration	10	26	P. durangensis	5	4122	4.122	0.4122	1.80245	1.98245	0.113858	0.0510028	0.0573387	0.025685
Natural regeneration	10	26	P. durangensis	6	5190.5	5.1905	0.51905	2.3215	2.5015	0.205962	0.0921041	0.103722	0.0463836
Natural regeneration	10	26	P. durangensis	7	9004	9.004	0.9004	3.2219	3.4019	0.450926	0.244964	0.227086	0.123364
Natural regeneration	10	26	P. durangensis	8	11579.5	11.5795	1.15795	4.37985	4.55985	0.951451	0.500525	0.479151	0.252064
Natural regeneration	10	26	P. durangensis	9	10937.5	10.9375	1.09375	5.4736	5.6536	1.64581	0.694358	0.828829	0.349679
Natural regeneration	10	26	P. durangensis	10	11656	11.656	1.1656	6.6392	6.8192	2.65383	1.00802	1.33647	0.507639
Natural regeneration	10	26	P. durangensis	11	9324.5	9.3245	0.93245	7.57165	7.75165	3.67909	1.02527	1.85279	0.516324
Natural regeneration	10	26	P. durangensis	12	7772.5	7.7725	0.77725	8.3489	8.5289	4.69368	1.01458	2.36374	0.510944
Natural regeneration	10	26	P. durangensis	13	6613.5	6.6135	0.66135	9.01025	9.19025	5.67782	0.984145	2.85935	0.495615
Natural regeneration	11	27	P. durangensis	1	9171.5	9.1715	0.91715	0.91715	1.20715	0.0321548	0.0321548	0.0161932	0.0161932
Natural regeneration	11	27	P. durangensis	2	6737.5	6.7375	0.67375	1.5909	1.8809	0.0995764	0.0674216	0.0501467	0.0339535
Natural regeneration	11	27	P. durangensis	3	5344.5	5.3445	0.53445	2.12535	2.41535	0.188362	0.0887853	0.094859	0.0447123
Natural regeneration	11	27	P. durangensis	4	7415	7.415	0.7415	2.86685	3.15685	0.372693	0.184332	0.187688	0.0928294
Natural regeneration	11	27	P. durangensis	5	11840.5	11.8405	1.18405	4.0509	4.3409	0.839298	0.466605	0.422671	0.234982
Natural regeneration	11	27	P. durangensis	6	13471	13.471	1.3471	5.398	5.688	1.67145	0.832154	0.841744	0.419073
Natural regeneration	11	27	P. durangensis	7	19267.5	19.2675	1.92675	7.32475	7.61475	3.51574	1.84429	1.77053	0.928784
Natural regeneration	11	27	P. durangensis	8	14764.5	14.7645	1.47645	8.8012	9.0912	5.52315	2.00741	2.78146	1.01093
Natural regeneration	11	27	P. durangensis	9	10553.5	10.5535	1.05535	9.85655	10.1465	7.30731	1.78416	3.67996	0.898502
Natural regeneration	12	28	P. durangensis	1	3286.5	3.2865	0.32865	0.32865	0.63865	0.0063461	0.0063461	0.0031959	0.0031959
Natural regeneration	12	28	P. durangensis	2	3689	3.689	0.3689	0.69755	1.00755	0.0202852	0.0139391	0.0102156	0.00701972
Natural regeneration	12	28	P. durangensis	3	5521.5	5.5215	0.55215	1.2497	1.5597	0.061784	0.0414988	0.0311144	0.0208988
Natural regeneration	12	28	P. durangensis	4	7544.5	7.5445	0.75445	2.00415	2.31415	0.168894	0.10711	0.085055	0.0539406
Natural regeneration	12	28	P. durangensis	5	9102	9.102	0.9102	2.91435	3.22435	0.393342	0.224448	0.198087	0.113032
Natural regeneration	12	28	P. durangensis	6	9952.5	9.9525	0.99525	3.9096	4.2196	0.780808	0.387466	0.393215	0.195128
Natural regeneration	12	28	P. durangensis	7	13510.5	13.5105	1.35105	5.26065	5.57065	1.58496	0.80415	0.798185	0.40497
Natural regeneration	12	28	P. durangensis	8	15859.5	15.8595	1.58595	6.8466	7.1566	3.00144	1.41648	1.51153	0.71334
Natural regeneration	13	29	P. durangensis	1	4366	4.366	0.4366	0.4366	0.5866	0.00510979	0.00510979	0.00257329	0.00257329
Natural regeneration	13	29	P. durangensis	2	4823.5	4.8235	0.48235	0.91895	1.06895	0.0235863	0.0184765	0.0118781	0.00930476
Natural regeneration	13	29	P. durangensis	3	5958	5.958	0.5958	1.51475	1.66475	0.0729504	0.0493641	0.0367378	0.0248597
Natural regeneration	13	29	P. durangensis	4	4979.5	4.9795	0.49795	2.0127	2.1627	0.142132	0.0691815	0.0715776	0.0348398
Natural regeneration	13	29	P. durangensis	5	7395.5	7.3955	0.73955	2.75225	2.90225	0.300796	0.158664	0.151481	0.0799031
Natural regeneration	13	29	P. durangensis	6	8214.5	8.2145	0.82145	3.5737	3.7237	0.567745	0.266949	0.285916	0.134436
Natural regeneration	13	29	P. durangensis	7	7804.5	7.8045	0.78045	4.35415	4.50415	0.922107	0.354362	0.464373	0.178457
Natural regeneration	13	29	P. durangensis	8	7517	7.517	0.7517	5.10585	5.25585	1.36656	0.44445	0.688198	0.223825
Natural regeneration	13	29	P. durangensis	9	5282.5	5.2825	0.52825	5.6341	5.7841	1.74437	0.377817	0.878467	0.190269
Natural regeneration	13	29	P. durangensis	10	5842	5.842	0.5842	6.2183	6.3683	2.2292	0.484822	1.12262	0.244156
Natural regeneration	14	30	P. durangensis	1	4614	4.614	0.4614	0.4614	0.7014	0.00805843	0.00805843	0.00405823	0.00405823
Natural regeneration	14	30	P. durangensis	2	5208.5	5.2085	0.52085	0.98225	1.22225	0.03319	0.0251315	0.0167145	0.0126562
Natural regeneration	14	30	P. durangensis	3	5617	5.617	0.5617	1.54395	1.78395	0.0870116	0.0538217	0.0438191	0.0271046
Natural regeneration	14	30	P. durangensis	4	9348	9.348	0.9348	2.47875	2.71875	0.254667	0.167656	0.128251	0.0844315
Natural regeneration	14	30	P. durangensis	5	11553.5	11.5535	1.15535	3.6341	3.8741	0.628034	0.373366	0.316278	0.188027
Natural regeneration	14	30	P. durangensis	6	20247	20.247	2.0247	5.6588	5.8988	1.8339	1.20587	0.923552	0.607274
Natural regeneration	14	30	P. durangensis	7	15606	15.606	1.5606	7.2194	7.4594	3.33581	1.50191	1.67991	0.75636
Natural regeneration	14	30	P. durangensis	8	10232.5	10.2325	1.02325	8.24265	8.48265	4.62908	1.29327	2.3312	0.651291
Natural regeneration	15	31	P. durangensis	1	6780	6.78	0.678	0.678	0.958	0.0178385	0.0178385	0.00898345	0.00898345
Natural regeneration	15	31	P. durangensis	2	10964	10.964	1.0964	1.7744	2.0544	0.124688	0.10685	0.0627929	0.0538094
Natural regeneration	15	31	P. durangensis	3	11258	11.258	1.1258	2.9002	3.1802	0.37976	0.255072	0.191247	0.128454
Natural regeneration	15	31	P. durangensis	4	18257.5	18.2575	1.82575	4.72595	5.00595	1.20699	0.827232	0.607841	0.416594
Natural regeneration	15	31	P. durangensis	5	18719.5	18.7195	1.87195	6.5979	6.8779	2.71244	1.50545	1.36599	0.758145
Natural regeneration	15	31	P. durangensis	6	17603	17.603	1.7603	8.3582	8.6382	4.84851	2.13607	2.44171	1.07573
Natural regeneration	15	31	P. durangensis	7	17999.5	17.9995	1.79995	10.1581	10.4381	7.85454	3.00603	3.95555	1.51383
Natural regeneration	15	31	P. durangensis	8	14026	14.026	1.4026	11.5607	11.8407	10.8313	2.9768	5.45466	1.49911
Natural regeneration	15	31	P. durangensis	9	10681	10.681	1.0681	12.6288	12.9088	13.4984	2.66709	6.79781	1.34315
Natural regeneration	16	32	P. durangensis	1	3513	3.513	0.3513	0.3513	0.6413	0.00641344	0.00641344	0.00322981	0.00322981
Natural regeneration	16	32	P. durangensis	2	4671.5	4.6715	0.46715	0.81845	1.10845	0.0258717	0.0194583	0.013029	0.0097992
Natural regeneration	16	32	P. durangensis	3	6135.5	6.1355	0.61355	1.432	1.722	0.079516	0.0536442	0.0400442	0.0270152
Natural regeneration	16	32	P. durangensis	4	7032.5	7.0325	0.70325	2.13525	2.42525	0.190336	0.11082	0.0958531	0.0558089
Natural regeneration	16	32	P. durangensis	5	8109	8.109	0.8109	2.94615	3.23615	0.397022	0.206686	0.19994	0.104087
Natural regeneration	16	32	P. durangensis	6	8805	8.805	0.8805	3.82665	4.11665	0.733167	0.336145	0.369223	0.169283
Natural regeneration	16	32	P. durangensis	7	9523	9.523	0.9523	4.77895	5.06895	1.24609	0.51292	0.627529	0.258306
Natural regeneration	16	32	P. durangensis	8	11170.5	11.1705	1.11705	5.896	6.186	2.07014	0.824049	1.04252	0.414991
Natural regeneration	16	32	P. durangensis	9	7983.5	7.9835	0.79835	6.69435	6.98435	2.82073	0.750594	1.42052	0.377999
Natural regeneration	16	32	P. durangensis	10	8424	8.424	0.8424	7.53675	7.82675	3.77063	0.949897	1.89889	0.478368

## Sheet: Sheet 2
Tree	DBSC	Year	D1	D2	DBCC	DBSC-DBCC	(DBSC-DBCC)/year
1	12.1748	12	13.6	15	14.3	2.12525	0.177104		Where:
2	6.8798	11	9.5	9	9.25	2.3702	0.215473		D1 = Diameter at the base
3	6.33625	9	7.8	7.9	7.85	1.51375	0.168194		D2 = Normal diameter
4	6.2156	8	7.5	7.8	7.65	1.4344	0.1793		DBSC = Basal Diameter without bark
5	10.7879	10	12.7	12.7	12.7	1.91205	0.191205		DBCC = Basal Diameter with bark
6	6.64575	8	8.9	8.4	8.65	2.00425	0.250531
7	6.59675	9	7.8	8.4	8.1	1.50325	0.167028
8	7.3254	8	10	9.4	9.7	2.3746	0.296825
9	7.68585	12	9.5	9.4	9.45	1.76415	0.147012
10	9.01025	13	10.9	11.8	11.35	2.33975	0.179981
11	9.85655	9	12.5	12.5	12.5	2.64345	0.293717
12	6.8466	8	9.3	9.3	9.3	2.4534	0.306675
13	6.2183	10	8.1	7.4	7.75	1.5317	0.15317
14	8.24265	8	9.9	10.5	10.2	1.95735	0.244669
15	12.6288	9	14.2	16.1	15.15	2.52115	0.280128
16	7.53675	10	10.5	10.3	10.4	2.86325	0.286325
